# Supplementary material for: Jinmaitong, a Traditional Chinese Compound Prescription, Ameliorates the Streptozocin-Induced Diabetic Peripheral Neuropathy Rats by Increasing Sciatic Nerve IGF-1 and IGF-1R Expression
Source: Front Pharmacol. 2019 Mar 29;10:255. doi: 10.3389/fphar.2019.00255 (PMC6450141; doi:10.3389/fphar.2019.00255)
Supplement: Supplementary file 4 [file Table_4.docx]

**Supplementary** **Table 4|** Effect of JMT on body weight in DPN rats.

| Group | *n* | Pre-treatment (g) | Post-treatment (g) | | | |
| --- | --- | --- | --- | --- | --- | --- |
| 4w | 8w | 12w | 16w |
| CON | 10 | 265±10 | 434±28 | 482±33 | 523±33 | 552±34 |
| DM | 8 | 239±20** | 301±28** | 310±29** | 315±32** | 317±32** |
| JMT-L | 10 | 238±17** | 315±37** | 323±35** | 328±32** | 329±34** |
| JMT-M | 9 | 241±13** | 319±41** | 325±38** | 330±35** | 335±40** |
| JMT-H | 9 | 240±21** | 303±22** | 316±26** | 321±22** | 323±22** |
| NTP | 9 | 239±18** | 309±23** | 326±22** | 332±20** | 340±22** |
| Data are shown as the mean standard deviation. ***P* <0.01 vs. Con group. Con, normal control; DM, diabetic model control; JMT, Jinmaitong; -L, -low-dosage; -M, medium-dosage; -H, -high-dosage; NTP, Neurotropin. | | | | | | |
